# Supplementary material
Source: Springer Nature journal article supplement (https://www.springermedizin.de/resource/supplementary/13058_2010_9489_MOESM10_ESM.pdf/9702258)
Supplement: MOESM10 [file 9702258]

|                                            | <b>Erlotinib<br/>N=13</b> | <b>Control<br/>N=14</b> | <b>p</b>    |
|--------------------------------------------|---------------------------|-------------------------|-------------|
| <b>Median disease-free survival (days)</b> | 365                       | 256                     | 0.0001      |
| <b>Number of tumors</b>                    | 19                        | 31                      | 0.0003      |
| <b>ER-positive tumors</b>                  | 14                        | 12                      | n.s.        |
| <b>ER-negative tumors</b>                  | 5                         | 19                      | 0.0000002   |
| <b>EGFR*</b>                               |                           |                         |             |
| <b>0</b>                                   | 10                        | 3                       | 0.0004      |
| <b>1+</b>                                  | 6                         | 8                       |             |
| <b>2+</b>                                  | 0                         | 6                       |             |
| <b>3+</b>                                  | 0                         | 2                       |             |
| <b>ALDH1* (SD)</b>                         | 3.8% (2.8%)               | 9.0% (9.8%)             | 0.11 (n.s.) |
| <b>Ki67* (SD)</b>                          | 21.4% (14%)               | 30.4% (17.7 %)          | 0.6 (n.s.)  |
| <b>Cleaved Caspase 3* (SD)</b>             | 18.4% (8.6%)              | 10.6 (8.4%)             | 0.018       |

**Tab. 1**
